# Supplementary material for: Pre-service and in-service teachers' professional vision depending on the video perspective—What teacher gaze and verbal reports can tell us
Source: Frontiers journal article supplement (doi:10.3389/feduc.2023.1282992), 2023-12-20
Supplement: Table_1.pdf [file Table_1.pdf]

## *Supplementary Material*

### **Pre-service and in-service teachers' professional vision depending on the video perspective – What teacher gaze and verbal reports can tell us**

**Corinne Wyss\*, Kerstin Bäuerlein, Sara Mahler**

**\* Correspondence:** Corinne Wyss: corinne.wyss@fhnw.ch

#### **1 Supplementary Tables**

##### ***Research Question 1***

Table 1: Cross-tabulation comparing the code “description” between PTs and ITs

|                   | <b>PT</b> | <b>IT</b> |
|-------------------|-----------|-----------|
| Teacher           | 35        | 56        |
| Student           | 33        | 66        |
| Learning material | 11        | 14        |
| No focus          | 26        | 20        |

Table 2: Cross-tabulation comparing the subcode “student” between PTs and ITs

|                                                                 | <b>PT</b> | <b>IT</b> |
|-----------------------------------------------------------------|-----------|-----------|
| Student walks around                                            | 0         | 2         |
| Student asks the teacher a question                             | 1         | 1         |
| Students only look at the tablet and do not participate         | 1         | 3         |
| Students fidget                                                 | 0         | 1         |
| Students have not yet started the assignment                    | 0         | 3         |
| Students talk with each other                                   | 2         | 1         |
| Students are working                                            | 2         | 3         |
| Students are quiet and focused                                  | 2         | 2         |
| Student sits down to the group                                  | 0         | 1         |
| Student answers the teacher                                     | 0         | 1         |
| Students do not look at the teacher when she explains something | 3         | 5         |
| Students look at the teacher                                    | 0         | 2         |
| Students listen to the teacher                                  | 1         | 3         |
| Students work with tablets                                      | 4         | 1         |
| Content of the assignment                                       | 2         | 2         |

Table 3: Cross-tabulation comparing the code “explanation” between PTs and ITs

|                                                         | <b>PT</b> | <b>IT</b> |
|---------------------------------------------------------|-----------|-----------|
| Alternative actions                                     | 0         | 2         |
| Teacher's thoughts/intentions                           | 0         | 7         |
| Evaluation of the teacher's actions                     | 3         | 3         |
| Advantages and disadvantages of the seating arrangement | 2         | 1         |
| Atmosphere/Climate                                      | 2         | 6         |
| Camera perspective                                      | 4         | 1         |

|                                                 |   |   |
|-------------------------------------------------|---|---|
| View of the teacher/camera guidance             | 1 | 5 |
| Description of the own focus of view            | 0 | 1 |
| Conjectures about students' cognitive processes | 2 | 8 |
| Conjectures about the content of the task       | 5 | 2 |

### *Research Question 2*

Table 4: Cross-tabulation comparing the code “description” between the three video perspectives

|                   | <b>Front camera</b> | <b>Back camera</b> | <b>Eye-tracking</b> |
|-------------------|---------------------|--------------------|---------------------|
| Teacher           | 31                  | 19                 | 41                  |
| Student           | 33                  | 33                 | 33                  |
| Learning material | 6                   | 9                  | 10                  |
| No focus          | 19                  | 17                 | 10                  |

Table 5: Cross-tabulation comparing the subcode “student” between the three video perspectives

|                                                                 | <b>Front camera</b> | <b>Back camera</b> | <b>Eye-tracking</b> |
|-----------------------------------------------------------------|---------------------|--------------------|---------------------|
| Student walks around                                            | 1                   | 1                  | 0                   |
| Student asks the teacher a question                             | 1                   | 0                  | 1                   |
| Students only look at the tablet and do not participate         | 1                   | 1                  | 2                   |
| Students fidget                                                 | 1                   | 0                  | 0                   |
| Students have not yet started the assignment                    | 2                   | 1                  | 0                   |
| Students talk with each other                                   | 0                   | 3                  | 0                   |
| Students are working                                            | 1                   | 2                  | 2                   |
| Students are quiet and focused                                  | 1                   | 2                  | 1                   |
| Student sits down to the group                                  | 0                   | 0                  | 1                   |
| Student answers the teacher                                     | 1                   | 0                  | 0                   |
| Students do not look at the teacher when she explains something | 4                   | 0                  | 4                   |
| Students look at the teacher                                    | 1                   | 0                  | 2                   |
| Students listen to the teacher                                  | 0                   | 3                  | 0                   |
| Students work with tablets                                      | 2                   | 2                  | 1                   |
| Content of the assignment                                       | 0                   | 2                  | 2                   |
